1 A hidden battle in the dirt: soil amoebae interactions with

2 *Paracoccidioides* spp

3 Patrícia Albuquerque<sup>1,2,8</sup>, André Moraes Nicola<sup>3,4,8</sup>, Diogo Almeida Gomes Magnabosco<sup>2</sup>, Lorena  
4 da Silveira Derengowski<sup>2,3</sup>, Luana Soares Crisóstomo<sup>2</sup>, Luciano Costa Gomes Xavier<sup>2</sup>, Stefânia  
5 de Oliveira Frazão<sup>2</sup>, Fernanda Guilhelmelli<sup>2</sup>, Marco Antônio de Oliveira<sup>2</sup>, Fabián Andrés  
6 Hurtado<sup>2</sup>, Marcus de Melo Teixeira<sup>3</sup>, Allan J. Guimaraes<sup>6</sup>, Hugo Costa Paes<sup>3</sup>, Eduardo Bagagli<sup>6</sup>,  
7 Maria Sueli Soares Felipe<sup>2,3</sup>, Arturo Casadevall<sup>7</sup>, Ildinete Silva-Pereira<sup>2</sup>

8

9 <sup>1</sup> Faculty of Ceilândia, University of Brasília, Brasília, DF, Brazil.

10 <sup>2</sup> Department of Cell Biology, Institute of Biological Sciences, University of Brasília, Brasília,  
11 DF, Brazil

12 <sup>3</sup> School of Medicine, University of Brasília, Brasília, Brazil

13 <sup>4</sup> Program in Genomic Sciences, Catholic University of Brasília, Brasília, DF, Brazil

14 <sup>5</sup> Military College, Brasília, Brazil

15 <sup>6</sup> Department of Microbiology and Parasitology, Biomedical Institute, Fluminense Federal  
16 University, Niteroi, RJ, Brazil;

17 <sup>7</sup> Department of Microbiology and Immunology, Biosciences Institute, UNESP, Botucatu, SP,  
18 Brazil

19 <sup>8</sup> Department of Molecular Microbiology and Immunology, Johns Hopkins Bloomberg School of  
20 Public Health, Baltimore, MD, USA

21 \*To whom correspondence should be addressed: Patricia Albuquerque, Universidade de Brasília.  
22 Instituto de Biologia. Dep. de Biologia Molecular. Laboratório de Biologia Molecular. Bloco K  
23 1 andar. Brasília. DF. Brazil. 70910-900. 130, Phone: +55 21 2629-2410. e-mail:  
24 [palbuquerque@unb.br](mailto:palbuquerque@unb.br) or [patricia.andrade@phd.einstein.yu.edu](mailto:patricia.andrade@phd.einstein.yu.edu)

25 Short title: Soil amoeba interactions with *Paracoccidioides* spp.

## 26 **Abstract**

27 *Paracoccidioides* spp. are thermodimorphic pathogenic fungi endemic to Latin America.  
28 Predation is believed to drive the evolution of virulence for soil saprophytes. We evaluated the  
29 presence of environmental amoeboid predators in soil from armadillo burrows where  
30 *Paracoccidioides* had been previously detected and tested if interaction of *Paracoccidioides* with  
31 amoebae increased fungal virulence. Nematodes, ciliates and amoebae – all potential predators of  
32 fungi – grew in cultures from soil samples. Microscopical observation and ITS sequencing  
33 identified the amoebae as *Acanthamoeba* spp, *Allovalkampiella spelaea* and *Vermamoeba*  
34 *vermiformis*. These three amoebae efficiently ingested, killed and digested *Paracoccidioides* spp.  
35 yeast cells, as did laboratory-adapted axenic *Acanthamoeba castellanii*. Sequential co-cultivation  
36 of *Paracoccidioides* with *A. castellanii* selected for phenotypical traits related to survival of the  
37 fungus within a natural predator as well as in murine macrophages and in vivo (*Galleria*  
38 *mellonella* and mice). This increase in virulence is linked to the accumulation of cell wall alpha-  
39 glucans, polysaccharides that masks recognition of fungal molecular patterns by host pattern  
40 recognition receptors. Altogether, our results indicate that *Paracoccidioides* inhabits a complex  
41 environment with multiple amoeboid predators that can exert selective pressure to guide the  
42 evolution of virulence traits.

43

44 **Key words: Paracoccidioidomycosis, PCM, *P. brasiliensis*, soil amoebae, virulence,**  
45 **ecology**

## 46 **Introduction**

47 Human beings are constantly challenged by microorganisms in virtually every environment and  
48 circumstance. Effective host immune responses, however, ensure that very few of them cause  
49 disease. Pathogenic microorganisms usually have a complex set of virulence attributes that allow  
50 them to evade immune effectors, proliferate and cause diseases [1]. Immunity is a crucial selective

51 pressure driving the evolution of virulence attributes in microbial pathogens tightly associated  
52 with mammalian hosts. However, the evolution of virulence in microbes that do not need to  
53 interact with mammals to complete their life cycles, such as the agents of most fungal invasive  
54 diseases, is far less clear. These agents include pathogenic species in the genus *Paracoccidioides*.  
55 Five species in this genus of thermodimorphic fungi, *P. brasiliensis*, *P. americana*, *P.*  
56 *restrepiensis*, *P. venezuelensis* and *P. lutzii*, cause paracoccidioidomycosis (PCM), one of the  
57 most prevalent systemic mycoses in Latin America [2, 3]. This neglected disease is an important  
58 cause of morbidity and mortality among men from rural areas in these countries. Infection occurs  
59 by the inhalation of airborne fungal propagules (mycelium fragments or conidia) from the  
60 environment, and most infections are asymptomatic. However, some patients do develop disease,  
61 which ranges from a mild pneumonia to life-threatening systemic disease [4, 5].

62 In the last two decades, a number of studies done with other species of invasive fungal pathogens  
63 (*Cryptococcus neoformans*, *C. gattii*, *Sporothrix schenckii*, *Blastomyces dermatitidis*,  
64 *Histoplasma capsulatum* and *Aspergillus fumigatus*) have provided a compelling explanation for  
65 the evolution of virulence in these soil saprophytes: avoiding predation by soil amoebae requires  
66 phenotypical traits that also provide protection against mammalian immune defenses and are thus  
67 associated with virulence [6-10]. Each of these fungi survived after co-cultivation with phagocytic  
68 unicellular organisms such as *Acanthamoeba castellanii* and *Dictyostelium discoideum* due to  
69 phenotypical traits that are also effective in evading human macrophages. Moreover, their co-  
70 cultivation with amoebae selects for survivors that are more virulent in mammalian models.  
71 Exposure to other soil predators such as ciliates and helminths suggests a more complex  
72 interaction scenario, beyond those seen with amoebae [11, 12]. These studies, however, were  
73 performed in controlled laboratory conditions using mostly pure and axenic cultures of  
74 laboratory-adapted predators; this very informative system is nonetheless an extreme  
75 simplification of the complex ecosystem soil saprophytes find in nature. In this work we have  
76 delved further into the ecology of the soil environment in a region where *Paracoccidioides* spp.  
77 had previously been confirmed by nested PCR, studying both the composition of predator  
78 populations and the interaction between some of these and *Paracoccidioides* cells. Cultures of the

79 soil samples revealed helminths, ciliates and multiple species of amoebae. We successfully  
80 isolated amoeba species and showed that they can ingest and efficiently kill *Paracoccidioides*  
81 spp. yeast cells. The same was observed in more detailed experiments with axenic cultures of *A.*  
82 *castellanii*. Sequential co-cultivation of *Paracoccidioides* cells with *A. castellanii* selected for  
83 fungal cells with increased virulence towards both phagocytes (amoebae and ex vivo mouse  
84 macrophages) and whole animals (*Galleria mellonella* and mice), possibly due to an increase in  
85 cell wall alpha-glucans. Our results support the hypothesis that interaction with sympatric soil  
86 predators selects for traits that allow survival of *Paracoccidioides* spp. in mammalian hosts and  
87 add to the existing evidence for the amoeboid predator-animal virulence hypothesis [13].

88

## 89 **Materials and methods**

### 90 *Paracoccidioides* spp. strains

91 For our studies we used the *P. brasiliensis* clinical isolated isolate Pb18, *P. brasiliensis* isolate  
92 T16B1, isolated from the spleen of a nine-banded armadillo (*Dasypus novemcinctus*) [14] and the  
93 *P. lutzii* isolate Pb01. The yeast phase of these isolates was maintained and prepared for  
94 interaction with soil amoebae as described in Supplemental Materials and Methods.

### 95 Axenic amoebae

96 *A. castellanii* 30234 (*American Type Culture Collection* - ATCC, Manassas, VA, USA) was  
97 cultivated in PYG medium (2% Proteose peptone, 0.1% yeast extract, 1.8% glucose, 0.1% Sodium  
98 citrate dihydrate, 2.5 mM Na<sub>2</sub>HPO<sub>4</sub>, 2.5 mM KH<sub>2</sub>PO<sub>4</sub>, 4 mM MgSO<sub>4</sub>, 400 μM CaCl<sub>2</sub>, 50 μM  
99 Fe(NH<sub>4</sub>)<sub>2</sub>(SO<sub>4</sub>)<sub>2</sub>) at 28°C as previously described [8].

### 100 Soil amoeba isolation and maintenance

101 Soil amoebae were isolated from samples of armadillo burrows located at Lageado Farm (−22°  
102 50' 14.36" latitude and −48° 25' 31.35" longitude), an area where an armadillo was captured and  
103 PbT16B1 was isolated; in this location the fungus had been also detected in soil by nested PCR  
104 [14]. Additionally, rural workers that have lived and/or worked in this region were diagnosed with

105 or died from PCM [15]. About five grams of each soil sample were mixed with 20 mL of sterile  
106 Page's modified Neff's amoeba saline (PAS – 2 mM NaCl, 33 mM MgSO<sub>4</sub>, 27 mM CaCl<sub>2</sub>, 1 mM  
107 Na<sub>2</sub>HPO<sub>4</sub>, 1 mM KH<sub>2</sub>PO<sub>4</sub>) and vigorously mixed to homogenize the samples. After sedimentation  
108 100 µL of each sample were spread over a plate of non-nutrient agar (PAS + 1.5% agar)  
109 containing a lawn of heat-killed *Escherichia coli* OP50. The plates were incubated at 25 °C for  
110 10-14 days and observed daily by light microscopy for the presence of cysts or trophozoites of  
111 amoebae [16, 17]. Agar sections containing cyst or trophozoites were cut and transferred to new  
112 plates to enrich the cultures. Finally, amoebae were transferred to PAS, counted and submitted to  
113 limiting dilution cloning. These freshly isolated amoebae were maintained in PAS or in non-  
114 nutrient agar plates with live or dead *E. coli* strain OP50 as a food source, respectively. The  
115 isolates were molecular typed for identification as described in the Supplemental Materials and  
116 Methods section.

#### 117 Soil amoeba and *P. brasiliensis* interaction assays.

118 The distinct amoeba isolates were collected from our culture stocks, washed three times to remove  
119 bacteria, plated onto glass-bottom plates and co-incubated with *P. brasiliensis* cells previously  
120 dyed with FITC or pHrodo™ (Thermo Fisher). The multiplicity of infection (MOI) was of one  
121 and co-incubation was carried out for 24 hours at 25 °C). The samples were then dyed with Uvitex  
122 to distinguish intracellular and extracellular fungal cells and observed in a Zeiss Axio Observer  
123 Z1 inverted microscope using a 40X/NA 0.6 objective for quantification of phagocytosis. A  
124 minimum of 100 amoebae per sample were analyzed, and the experiments were performed at least  
125 three times on different days. Alternatively, predation assays in which soil amoebae were  
126 incubated in solid non-nutrient agar with a lawn of *P. brasiliensis* cells were performed as  
127 described in the Supplemental Material and Methods section. Soil amoeba viability after the  
128 interaction was assessed by Trypan blue exclusion as previously described [8].

129 Phagocytosis and killing assay for the interaction of *Paracoccidioides* spp with

130 axenic *A. castellanii*

131 Cells of *A. castellanii* were plated onto 96- or 24-well microplates at  $5 \times 10^4$  and  $2 \times 10^5$  cells/well,  
132 respectively, and incubated with yeast cells ( $1 \times 10^5$  and  $4 \times 10^5$  cells/well) for different time  
133 intervals (6, 24 or 48 h) at 28 °C or 37 °C (MOI = 2). After co-incubation, the supernatant was  
134 discarded, the cells were fixed with cold methanol for 30 min at 4 °C and overnight-stained with  
135 Giemsa. The samples were then observed and photographed in the Zeiss Axio Observer Z1  
136 inverted microscope. Alternatively, phagocytosis was evaluated using fungal cells previously  
137 dyed with CMFDA or FITC before the interaction. At each condition the percentage of  
138 phagocytosis was evaluated after Giemsa staining. A minimum of 100 amoebae per sample were  
139 analyzed, and the experiments were performed at least three times on different days. *A. castellanii*  
140 viability after the interaction was assessed by Trypan blue exclusion as previously described [8].  
141 Fungal survival after the interaction was assessed by CFU counting after amoeba lysis as  
142 described in the Supplemental Materials and Methods section.

143 Microscopical analysis of *Paracoccidioides* spp interaction with amoebae

144 We further analyzed the interaction between different soil amoeba with *Paracoccidioides* spp  
145 using confocal microscopy, Transmission Electron Microscopy (TEM) and Scanning Electronic  
146 Microscopy (SEM). The detailed approach for each technique is described in the Supplemental  
147 Materials and Methods section.

148 Sequential passages of interaction of *A. castellanii* and *Paracoccidioides* spp

149 We co-cultured *Paracoccidioides* spp. cells with *A. castellanii* for six hours at 28 °C in PYG  
150 medium at a MOI of two. The cells were then detached from the plates and passed 5-8 times  
151 through a 26-Gauge syringe to lyse amoebae. The remaining yeast cells were plated onto solid  
152 BHI-Sup (4% horse serum, 5% conditioned medium of the Pb192 strain of *P. brasiliensis*, 34  
153 µg/mL chloramphenicol). The plates were incubated at 37 °C for a week, and the recovered cells  
154 were collected from the plates, washed three times with PBS, counted and used in a subsequent  
155 round of interaction with *A. castellanii* for another six hours. This process was repeated five times

156 and the resulting passaged strains were then named Pb18-Ac. The Pb18 strain, cultured in PYG  
157 for six hours at 28 °C, and then plated onto BHI-Sup was used as a control.

### 158 *Galleria mellonella* infection

159 Wax moth larvae were raised in our lab and further details on the infection assay are described in  
160 the Supplemental Materials and Methods section. Shortly, groups of 12-16 individuals received  
161 an injection of 10 µl of PBS or yeast cell suspension (Pb18 or Pb18-Ac) at 10<sup>6</sup> cells/mL in the  
162 hind left proleg. The groups of infected larvae were placed in Petri dishes, incubated at 37 °C and  
163 daily monitored for survival.

### 164 Mouse infection and survival analysis

165 We infected isogenic 10-week-old BALB/c male mice with Pb18-Ac, using the non-passaged  
166 strain as negative control. The cells from each group were collected from BHI-sup plates after  
167 five days of culture, washed in PBS, counted, assessed for viability and diluted to the appropriated  
168 cell densities. The mice were anesthetized using a combination of 100 mg/kg of body weight  
169 ketamine and 10 mg/kg of body weight xylazine administered intraperitoneally. For infection, 10<sup>6</sup>  
170 cells of either sample were intratracheally inoculated into two groups of 14 mice each. The  
171 animals were clinically monitored during 12 months after infection and moribund animals  
172 (defined by lethargy, dyspnea, and weight loss) were euthanized. The experiment was set up as a  
173 blind assay: the experimenters who infected and monitored the mice did not know which strain  
174 had been administered to each group until after the experiment finished. All mouse experiments  
175 were pre-approved by the Committee for Use of Animals in Research of the Catholic University  
176 of Brasília (protocol 017/14) in agreement with Brazilian laws for use of experimental animals  
177 and the Ethical Principles in Animal Research adopted by the Brazilian College for Control of  
178 Animal Experimentation.

179 Quantitative RT-PCR of *P. brasiliensis* Pb18 and Pb18-Ac genes potentially  
180 involved in host-pathogen interaction

181 We analyzed the accumulation of selected transcripts previously involved in fungal response to  
182 macrophage or amoeba interaction by quantitative real time PCR as described in the Supplemental  
183 material and methods section.

184 Flow cytometry analysis for the detection of alpha-glucan at the fungal cell wall

185 Pb18 and Pb18-Ac cells were paraformaldehyde-fixed and incubated with the anti- $\alpha$  glucan  
186 antibody MOPC 104E (Sigma) and then with a secondary anti-IgM conjugated with Alexa<sup>®</sup> fluor  
187 488. After washing, cell suspensions were analyzed in a BD LSR Fortessa flow cytometer. The  
188 resulting data were analyzed using FlowJo software.

189 Statistical analysis

190 All statistical analyses were performed using GraphPad Prism 8.0 (GraphPad software).  
191 Percentage phagocytosis and percentage of amoeba viability (% Dead amoeba) were evaluated  
192 using Fisher's exact test. Survival curves were analyzed using log rank and Wilcoxon tests. For  
193 CFU experiments we used one-way ANOVA with Tukey's multiple comparison test or unpaired  
194 t test when comparing only two samples. Quantitative PCR analysis was performed with unpaired  
195 t tests.

196 **Results**

197 1. Multiple groups of potential predators are present in the environment in which  
198 *P. brasiliensis* lives

199

200 Initial microscopical analysis of cultures obtained from soil samples positive for  
201 *Paracoccidioides* DNA as schematically represented in Figure 1A revealed the presence of  
202 multiple potential predators, including several amoeba morphotypes, ciliates and nematodes  
203 (Figure 1B-I). Although ciliates and nematodes are known to predate *C. neoformans* [11, 12], we  
204 chose to focus on ameboid predators. After using limiting dilution to obtain plates that seemed to



205 contain only one type of amoeba, we made several attempts to establish axenic or monoxenic  
206 cultures. We were not successful, however, even in the presence of several antibiotics. We  
207 isolated DNA from the different isolates and performed PCR using primers specific to *Amoebozoa*  
208 and for *Acanthamoeba* spp identification. Sequencing and comparison against GenBank revealed  
209 that we had isolated members of *Allovalkampiella spelaea*, *Vermamoeba vermiformis* (formerly  
210 *Hartmannella vermiformis*) and *Acanthamoeba* spp (Sequences were deposited under BioProject  
211 506281).

212

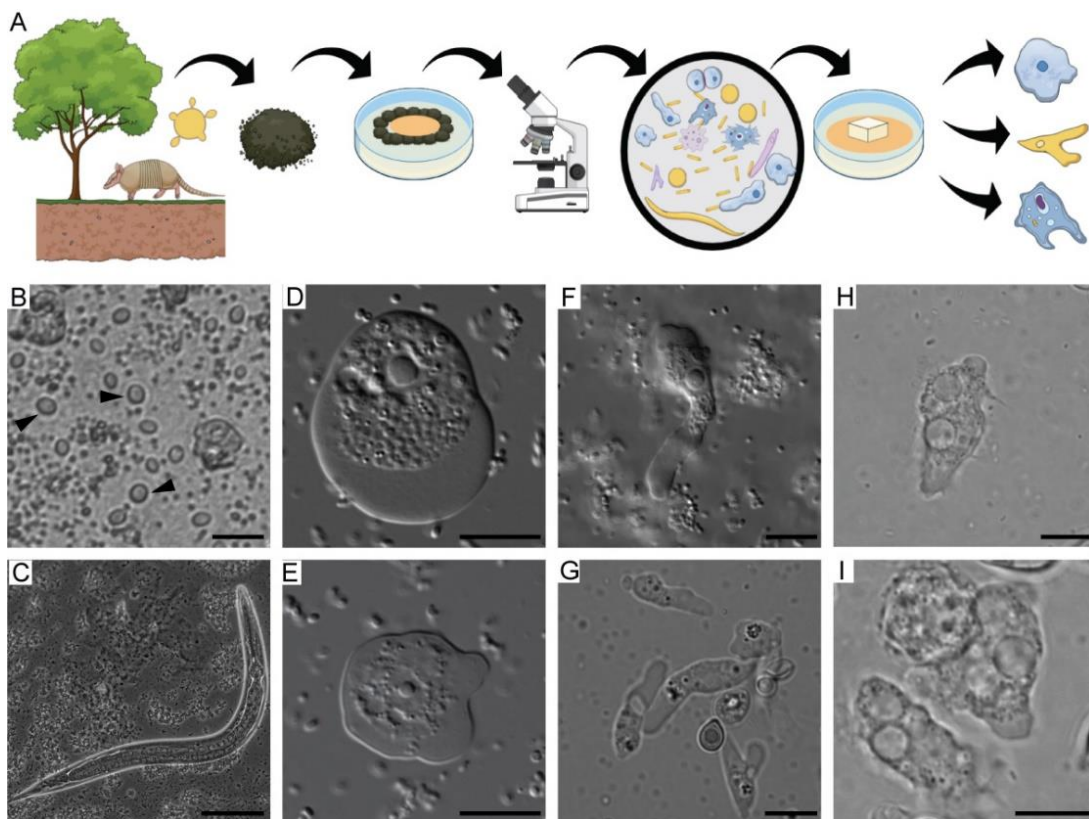

213

214 **Figure 1– Soil organisms sharing the putative habitat of *P. brasiliensis*.** A) Schematic representation  
215 of the soil amoeba isolation methodology. Soil samples from armadillo burrows positive for *P.*  
216 *brasiliensis* DNA were collected and used for the isolation of soil amoebae. The samples were  
217 plated in non-nutrient agar plates containing a bacterial lawn as food source and observed in an  
218 inverted microscope B) Bright field microscopy of trophozoites of ciliates (black arrow heads)  
219 present in a soil sample. Scale bar = 20  $\mu\text{m}$ , C) Bright field microscopy of a nematode present in  
220 the soil sample. Scale bar = 50  $\mu\text{m}$ , D) and E) DIC microscopy of trophozoites of *A. spelaea*.  
221 Scale bar = 10  $\mu\text{m}$ . F and G) DIC microscopy of trophozoites of *V. vermiformis*. Scale bar = 10  
222  $\mu\text{m}$ . H and I) DIC microscopy of trophozoites of *Acanthamoeba* spp. Scale bar =10  $\mu\text{m}$ .

## 223 2. Soil amoeba isolates interact with and kill *P. brasiliensis* yeast cells.

224 We tested if these soil amoebae were able to phagocytose *P. brasiliensis* cells by co-incubating  
225 them for 24 h in PAS after adding antibiotic and removing most of the bacterial cells that were  
226 used to feed the amoebae. The three amoeba isolates were each able to phagocytose *P. brasiliensis*  
227 cells (Figure 2A), even in the presence of remaining bacterial cells from amoeba cultures, which  
228 are probably a preferential food source. We also observed that the isolated *Acanthamoeba* spp.  
229 had decreased viability after 24 h of co-incubation with *P. brasiliensis*, while the isolated *A.*  
230 *spelaea* was able to survive better in the presence of yeast cells (Figure 2B).

231 The presence of antibiotic resistant bacteria in the isolated amoebae cultures prevented us from  
232 evaluating *P. brasiliensis* viability after soil amoeba interaction by CFU counting. Due to the slow  
233 growth rate of this fungus, all the plates would be covered with bacteria before we could observe  
234 fungal colonies. To address this limitation, we performed predation assays in non-nutrient agar  
235 plate where *P. brasiliensis* lawns were confronted with soil amoeba isolates. We were able to  
236 observe a region of fungal cell clearance in the plates starting at 7 d of interaction with all the  
237 amoeba isolates as depicted in in Supplementary Figure 1. In Figure 2C-2F we can observe the  
238 interaction in solid medium of *A. spelaea* with *P. brasiliensis* cells. After seven days of co-  
239 incubation we could see many trophozoites mixed in the fungal cell lawn and around the colony  
240 (Figure 2D). Most fungal cells presented altered morphology resembling dead empty shells  
241 (Figure 2E) and we observed some fungal cells interacting with amoebae in Figure 2F.  
242 Additionally, after two weeks or more of interaction, we observed scarce fungal filamentation in  
243 the co-culture samples, possibly because most fungal cells were dead, while the control fungal  
244 spots without amoebae displayed intense filamentation.

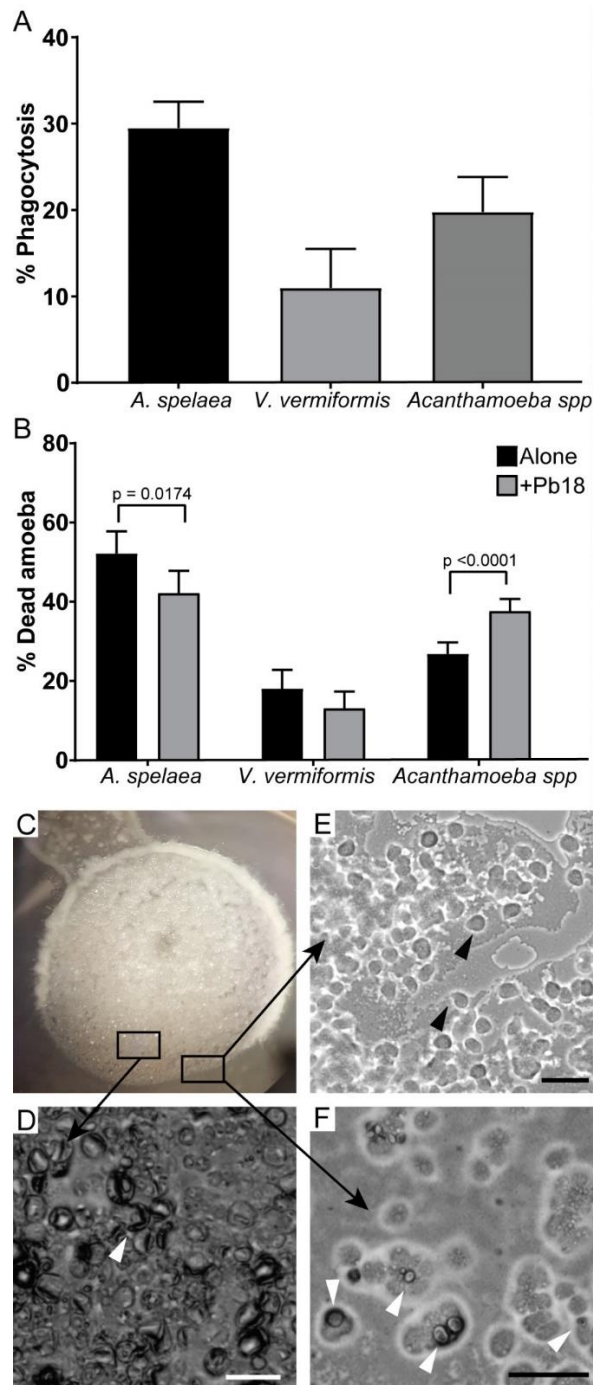

245

246 **Figure 2– Interaction of *P. brasiliensis* Pb18 with amoebae isolated from soil of armadillo burrows**  
247 **positive for *P. brasiliensis*.** The amoeba isolates were co-incubated with Pb18 previously dyed with  
248 pHrodo™ or FITC at a MOI of two at 25 °C for 24 h in liquid medium. A) Percentage of amoeba  
249 cells interacting with *P. brasiliensis* Pb18. After the interaction Pb18 cells were dyed using Uvitex  
250 2B. B) Viability of the different amoeba isolates after 24 h of interaction with Pb18. A and D  
251 depicts the results of at least three independent experiments. At least 100 cells per replicate of  
252 each sample were counted for each assay. The bars represent 95% confidence intervals. C-F a  
253 suspension of *A. spelaea* cells was dropped next to a colony of *P. brasiliensis* cells in non-nutrient  
254 agar. The cells were co-incubated at 25 °C and examined daily in an inverted microscope. C)  
255 Macroscopic view of the fungal colony in a 35 mm plate. D) Microscopic view of the fungal cell  
256 lawn after seven days of interaction. E) Microscopic view of amoeba trophozoites growing in the  
257 periphery of the fungal lawn. F) Microscopic view of amoeba trophozoites interacting with a  
258 fungal cell. Scale bars = 50  $\mu$ m. Black arrow heads indicate trophozoites. White arrow heads  
259 indicate fungal cells.

260 We further evaluated the fungal interaction with three different species of amoeba in saline  
261 suspension after 24 h of interaction by TEM and SEM as presented in Figure 3. TEM analysis  
262 revealed internalized fungal cells and cell wall debris inside amoeba vacuoles (Figure 3A-J) and  
263 the presence of several extracellular empty fungal shells, some of them collapsed with little or no  
264 cytoplasm (Figure 3E-I). SEM confirmed the contact between the two microbes in all the  
265 interactions (Figure 3C, G, L). It should be noted that *V. vermiformis* cells can be considerably  
266 smaller than large *P. brasiliensis* mother cells (Figure 3K, L). Extreme morphological alterations  
267 were observed in most fungal cells upon interaction with the three amoebae. We observed many  
268 collapsed fungal cells, including mother cells with shrinking buds (Figure 3 G, H, L). Fungal cells  
269 presenting damage in their cell walls might explain the observation of empty cells walls in TEM  
270 (Figure 3 D, H, K). Altogether these results confirm the ability of amoebae to kill  
271 *Paracoccidioides* and strategies beyond fungal phagocytosis must be considered to explain how  
272 they do it.

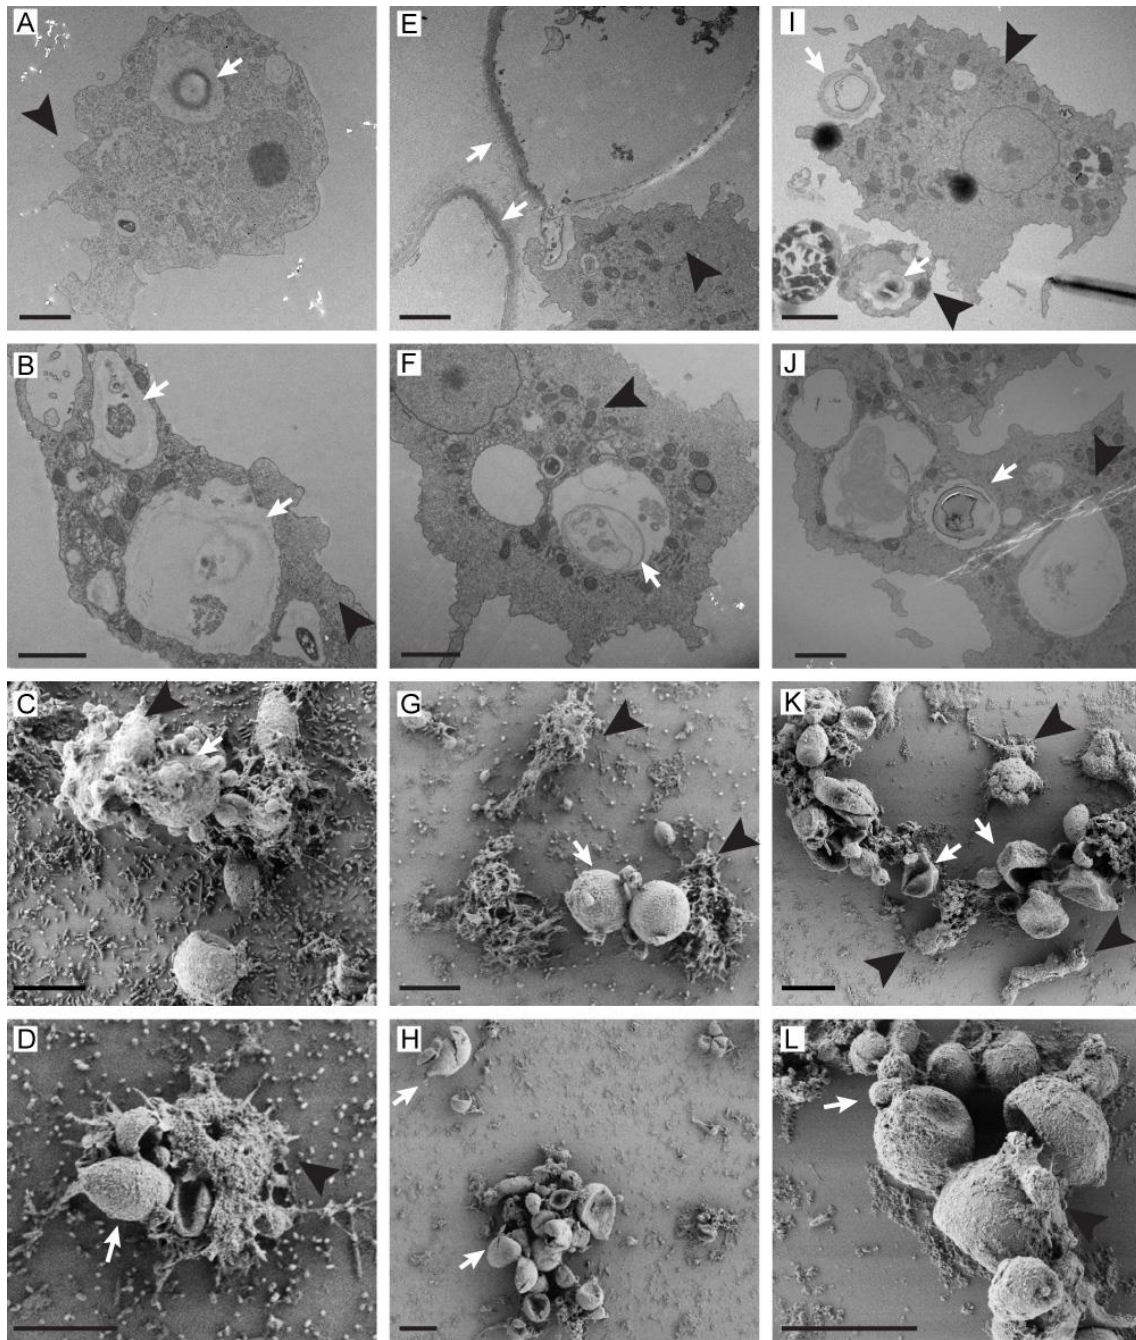

273

274 **Figure 3– TEM and SEM analysis of the interaction of *P. brasiliensis* Pb18 cells and different soil**  
275 **amoebae.** The isolates were co-incubated with Pb18 at a MOI of five at 25 °C for 24 h in PAS  
276 and fixed for microscopy. A-B) TEM of the interaction of *P. brasiliensis* with *A. spelaea*. Scale  
277 bars = 500 nm. C-D) SEM of the interaction of *P. brasiliensis* with *A. spelaea*. Scale bars = 10  
278 µm. E-F) TEM of the interaction of *P. brasiliensis* with *Acanthamoeba* spp. Scale bars = 2 µm.  
279 G-H) SEM of the Interaction of *P. brasiliensis* with *Acanthamoeba* spp. Scale bars = 10 µm. I-  
280 J) TEM of the interaction of *P. brasiliensis* with *V. vermiformis*. Scale bars = 2 µm. K-L) SEM  
281 of the interaction of *P. brasiliensis* with *V. vermiformis*. Scale bars = 10 µm. White arrows  
282 indicate fungal cells, or their remains and black arrow heads indicate amoeba cells.

283

284 3. *Acanthamoeba castellanii* from axenic cultures can efficiently phagocytose  
285 and kill *P. brasiliensis* cells

286

287 Since the soil bacteria that remained in amoeba cultures was a third component of the  
288 microbial interaction system, and therefore a confounding factor, we decided to further evaluate  
289 the interaction of fungal cells with soil amoebae using axenized cultures of *A. castellanii*. Analysis  
290 of the co-culture of *A. castellanii* with Pb18 by light microscopy after Giemsa staining (Figure  
291 4A-B), transmission electron microscopy (Figure 4C) and confocal microscopy (Figure 4D)  
292 revealed the interaction with and ingestion of yeast cells by amoebae. The cell wall-labelling dye  
293 Uvitex 2B (blue), which does not penetrate cells that are viable or not permeabilized, confirmed  
294 that some fungi were internalized. The black arrow in Figure 4D indicates an internalized yeast  
295 cell that is not labelled with CMFDA, which together with the irregular morphology suggests that  
296 this yeast cell is probably dead.

297 The percentage of phagocytosis of *P. brasiliensis* by *A. castellanii* was followed at different  
298 time intervals, from 30 minutes to 24 hours of interaction. It varied from 39% at 30 minutes to  
299 68% at six hours (Supplementary Figure 2).

300 We also evaluated the outcome of amoeba predation by measuring fungal cell viability  
301 by CFU after six and 24 hours of interaction with *A. castellanii* cells. There was no significant  
302 reduction in fungal survival with or without amoeba at the earlier time point (Figure 4E), but the  
303 number of fungal CFUs was reduced by 90% after 24 hours of interaction (Figure 4F), indicating  
304 that *A. castellanii* was very efficient in fungal killing. On the other hand, the trypan blue exclusion  
305 assay on amoebae after interaction with *P. brasiliensis* showed that amoeba viability was barely  
306 affected by the fungus. We only found a small difference in their viability at the six-hour time  
307 point at 28 °C, but not at other times points at this temperature or at any time points at 37 °C when  
308 compared to the non-infected controls (Supplementary Figure 3A). To evaluate whether this effect  
309 resulted from a broader loss of virulence due to in vitro subculturing of the fungus, we tested the  
310 virulence of the same Pb18 isolate against J774 macrophages. In contrast with our observations

311 with amoebae, we observed a significant decrease in macrophage viability after 24 (a 16% to 25%  
312 increase in dead cells) or 48 hours of interaction (22% to 33%) (Supplementary Figure 3A).

313

314

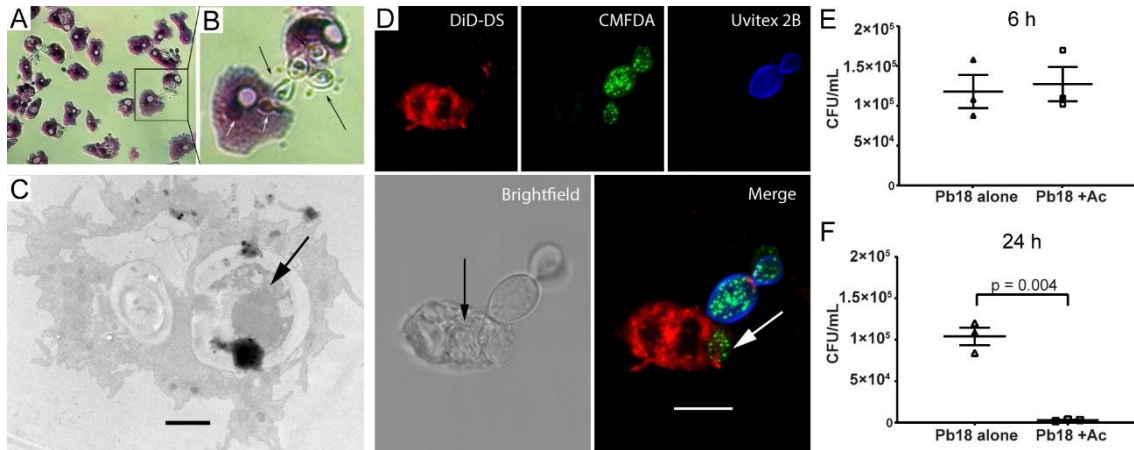

315

316 **Figure 4- *P. brasiliensis* Pb18 interaction with an axenic *Acanthamoeba castellanii* strain.** **A)** *P.*  
317 *brasiliensis* and *A. castellanii* were co-incubated at a MOI of one for one hour at 28 °C, and then  
318 stained with Giemsa and observed by light microscopy. **B)** Enlargement of the area depicted in  
319 the square region of panel A. **C)** TEM of the interaction of *A. castellanii* and Pb18 cells.  
320 Incubation was at a MOI of one for six hours at 28 °C and then fixed. The black arrow indicates  
321 an internalized *P. brasiliensis* (Scale bar = 2 µm). **D)** Confocal microscopy. *A. castellanii* was  
322 dyed with DiD-DS (red), while *P. brasiliensis* cells were labeled first with CMFDA (green), and  
323 after the interaction with Uvitex 2B (blue). The arrows show fungal cells inside an amoeba. (Scale  
324 bar = 10 µm). **E** and **F)** Survival of *P. brasiliensis* after interaction with *A. castellanii* interaction.  
325 Incubation was at a MOI of two at 28 °C for six (**E**) or 24 hours (**F**), using the fungus alone as a  
326 control. After the interaction amoeba cells were lysed and fungal cells were plated for CFU  
327 counting. The figure depicts the results of three independent experiments. The error bars represent  
328 standard error of the mean.

329

330 4. There are differences in the ability of different strains of *Paracoccidioides* spp.

331 to survive interaction with amoebae

332

333 We also evaluated the interaction of *A. castellanii* with *P. lutzii* (Pb01) and *P. brasiliensis*  
334 T16B1, an isolate obtained from an armadillo. *A. castellanii* was able to internalize cells of the  
335 three different isolates of *Paracoccidioides* spp. at similar rates (Figure 5A). There was no  
336 difference in the ability of *P. lutzii* strain Pb01 relative to Pb18 to kill amoebae or to survive at  
337 six hours of interaction (Figure 5B-C). However, co-incubation with T16B1 resulted in a time  
338 dependent increase in the amoeba mortality in comparison to both other strains (Figure 5B and

339 **Error! Reference source not found.**), while the other two isolates were able to induce a transient  
340 decrease in amoeba viability only at 6 hours of interaction. In addition, the armadillo isolate was  
341 also able to survive the interaction with amoebae better than the other two strains (Figure 5C).  
342 We observed an increase of roughly five-fold in the CFU of T16B1 after the interaction in  
343 comparison to the other two strains.

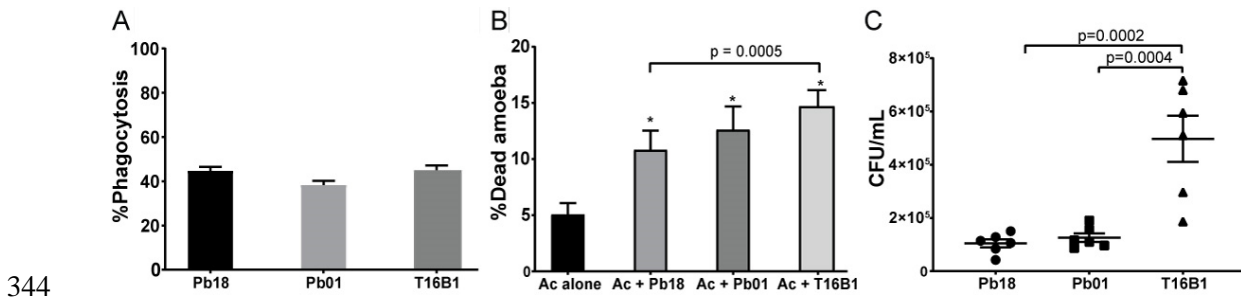

344  
345 Figure 5. **Interaction of *Paracoccidioides* spp strains with *A. castellanii* at six hours.** Amoebae and  
346 three different strains of *Paracoccidioides* spp (Pb18 – *P. brasiliensis*, Pb01 – *P. lutzii*, T16B1 –  
347 *P. brasiliensis* isolated from an armadillo spleen) were co-incubated at a MOI of two at 28 °C. **A)**  
348 Percentage of *A. castellanii* cells interacting with *Paracoccidioides* spp. The interaction was  
349 assessed by counting at least 100 phagocytes cells per replicate of each sample after Giemsa  
350 staining of the samples. The bars represent 95% confidence intervals. **B)** Viability of *A. castellanii*  
351 upon interaction with *Paracoccidioides* spp. The viability was assessed by counting at least 100  
352 cells per replicate of each sample after staining with trypan blue. The bars represent means plus  
353 95% confidence intervals. **C)** Survival of fungal cells from different strains of *Paracoccidioides*  
354 spp following interaction with amoebae. The error bars represent standard error of the mean.  
355 Figures depict the combined results of at least three independent experiments. \*All the strains  
356 showed a significant difference in the % of dead amoebae at six hours relative to the control  
357 amoebae growing alone.

358

359 5. Sequential passages of interaction of *P. brasiliensis* with *A. castellanii* select  
360 for fungal cells with significant changes in their ability to survive and interact  
361 with different host models.

362

363 We evaluated if sequential rounds of interaction of *P. brasiliensis* with amoebae were able to select  
364 fungal cells with increased virulence as previously reported for *H. capsulatum* [7]. We submitted  
365 the fungus to six hours of interaction with amoebae at 28 °C in PYG medium. The amoebae were  
366 then lysed and all interacting fungal cells (intracellular and extracellular) were collected and plated  
367 in solid BHI-sup medium. This procedure was repeated 5 additional times, resulting in Pb18-Ac



368 strains. Both Pb18-Ac and Pb18 strains were used in co-cultures with *A. castellanii* and J774  
369 macrophages and to infect *G. mellonella* and BALB/c mice. When comparing Pb18-Ac cells to  
370 the control strain, the phagocytosis decreased from 55.4% to 44.6% (Figure 6A), the proportion  
371 of dead amoebae increased from 10.8% to 15.9% (Figure 6B) and the number of fungal CFUs  
372 increased 2.5-fold (Figure 6C).  
373

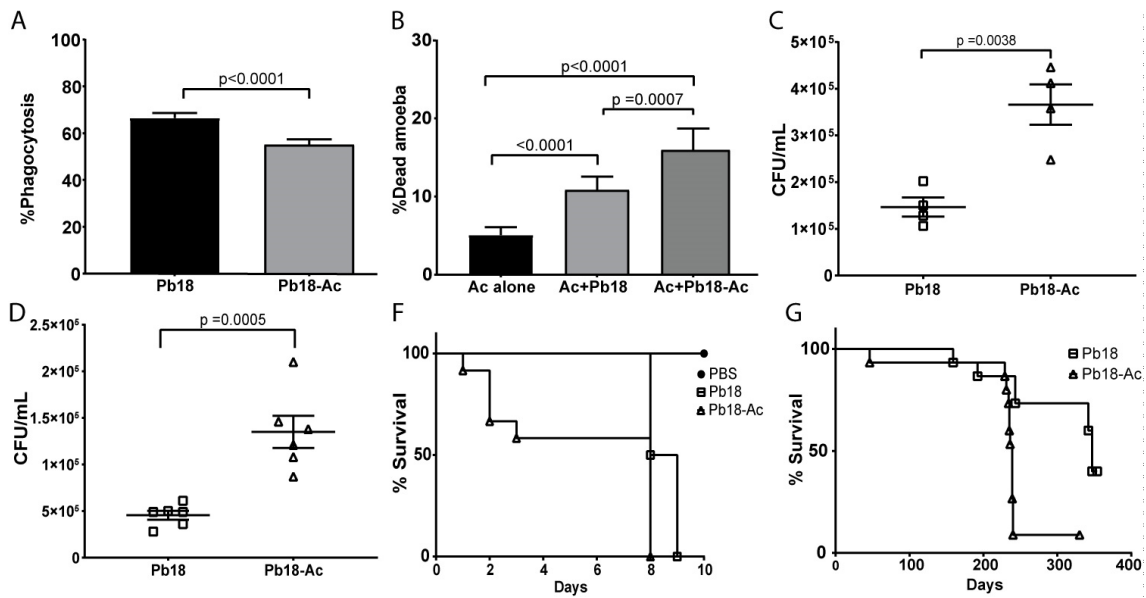

374

375 **Figure 6– Effects of sequential passaging of Pb18 within amoebae, assessed in several models of**  
376 **infection.** Pb18 and Pb18 Pb-Ac cells were co-incubated with *A. castellanii* at a MOI of two at  
377 28°C for six hours. A) Percentage of *A. castellanii* cells interacting with Pb18 and Pb18-Ac. B)  
378 Viability of *A. castellanii* after six hours of interaction with Pb18 and Pb18-Ac. C) Survival of  
379 Pb18 and Pb18-Ac upon interaction with *A. castellanii*. D) Survival of Pb18 and Pb18 Pb-Ac  
380 upon interaction with J774 macrophages. E) Survival curve of *G. mellonella* infected with Pb18  
381 and Pb18-Ac. The curve is representative of two biological replicates. P<0.0001 for the  
382 comparison of the survival curve of larvae infected with the two different strains (log-rank test).  
383 F) Survival curve of BALB/c mice infected with Pb18 or Pb18 Pb-Ac. Each group had 15 mice.  
384 p= 0.0003 for the comparison of the survival curve of mice infected with the two strains (log-rank  
385 test). A-D depict the combined results of at least two independent experiments. The bars represent  
386 means plus 95% confidence intervals in A and B and standard error mean in C and D.

387

388 Additionally, we also tested whether the changes in Pb-Ac interaction with amoebae  
389 could also be translated to other models. The number of recovered fungi in the wells with Pb18-  
390 Ac was significantly higher than the control strain after six hours of interaction with J774

391 macrophages (Figure 6D). Additionally, Pb18-Ac was also able to kill *G. mellonella* larvae and  
 392 BALB/c mice significantly faster than the control strain (Figure 6E-F).

393 6. Sequential passaging of *P. brasiliensis* affects the accumulation of selected  
 394 virulence transcripts and increases accumulation of cell wall  $\alpha$ -glucans

395

396 Quantitative PCR analysis was carried out to search for changes in the levels of fungal  
 397 transcripts that were previously shown to be modulated upon interaction with amoebae or  
 398 macrophages [18-20]. No major changes were noticed in the accumulation of the transcripts of  
 399 the selected genes between the two strains. The minor changes observed included a slight increase  
 400 of HADH and HSP60 in Pb18-Ac (Figure 7B and E) and a slight decrease of *MS1* and *SOD1*  
 401 expression (Figure 7C and D).

402

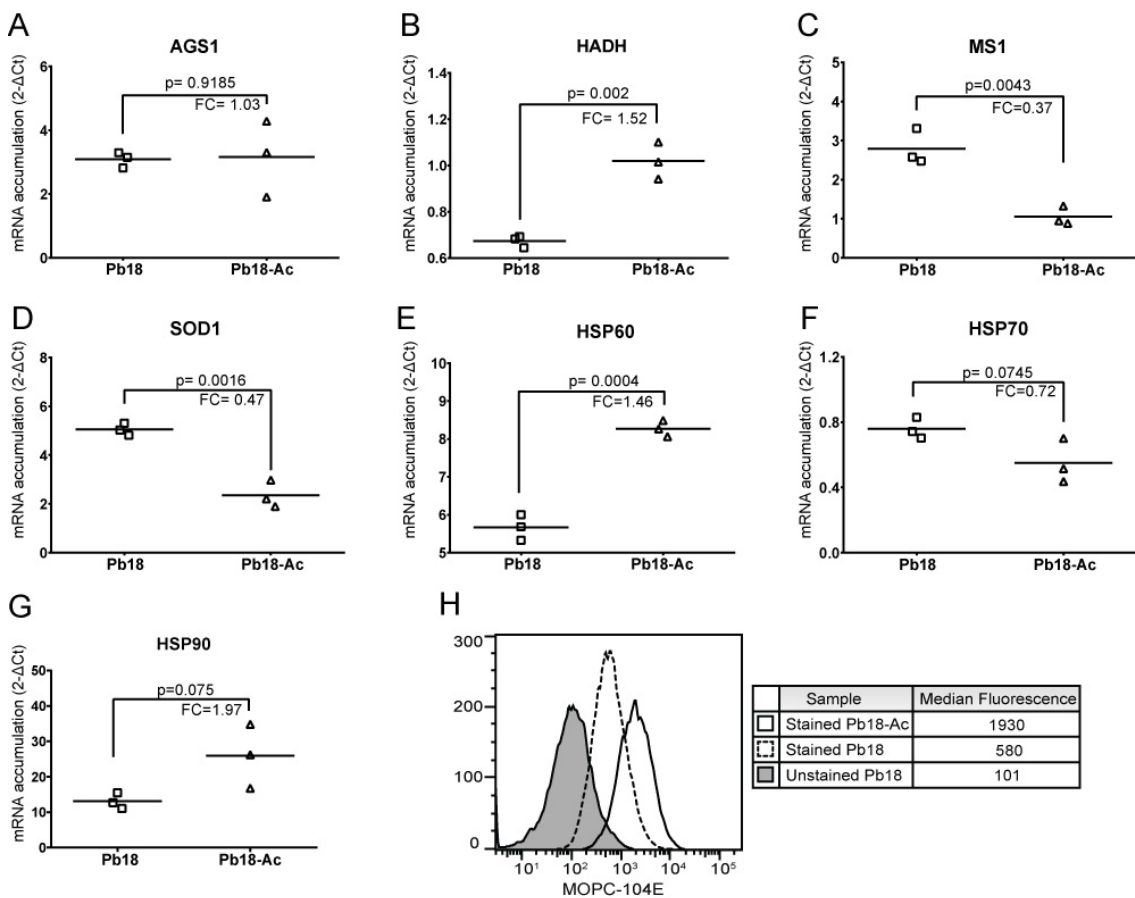

403

404 Figure 7- **Modulation of Pb18 gene expression after passaging with amoebae.** Transcript  
405 accumulation was determined by the comparative threshold method using the  $\Delta C_t$  value obtained  
406 after normalization with the constitutively expressed gene L34. Data are reported as individual  $2^{-\Delta C_t}$   
407  $\Delta C_t$  values of three independent experiments for each group and the bar represents their respective  
408 means. FC = *fold change in mRNA accumulation*, obtained as the ratio Pb18-Ac/Pb18. \*\* =  
409  $p < 0.01$ . \*\*\* =  $p < 0.001$ . ns =  $p > 0.05$ . **A)** AGS1:  $\alpha$ -glucan synthase, **B)** HADH: Hydroxyacyl-CoA  
410 Dehydrogenase, **C)** MS1: malate synthase, **D)** SOD1: superoxide dismutase 1, **E)** HSP60: Heat  
411 shock protein 60, **F)** HSP70: Heat shock protein 70, **G)** HSP90: Heat shock protein 90. **H)** Cell  
412 surface staining of  $\alpha$  glucan in the surface of Pb18 and Pb18-Ac.

413

414 As we observed a decrease in the percentage of phagocytosis of *A. castellanii* co-  
415 incubated with the passaged strain, we evaluated if there were any changes in the fungal surface  
416 that might affect its internalization. For that, paraformaldehyde-fixed Pb18 and Pb18-Ac cells  
417 were incubated with the monoclonal antibody MOPC-104E, which binds to fungal  $\alpha$ -glucans [21]  
418 and analyzed by flow cytometry. Figure 7H shows a 3.3-fold increase in the signal for  $\alpha$ -(1,3)-  
419 glucan in the passaged cells relative to the non-passaged strain. As an increase in the accumulation  
420 of  $\alpha$ -glucan synthase transcripts was not detected by qPCR (Figure 7A), these results suggest that  
421 passaging through amoebae affect the content of  $\alpha$ -(1,3)-glucans in *P. brasiliensis* cell wall  
422 through other mechanism that not mRNA accumulation.

## 423 Discussion

424

425 *Paracoccidioides spp.* are thermomimorphic fungal pathogens that cause PCM, a systemic  
426 mycosis prevalent in Latin America [2]. Although this disease has been known for more than a  
427 century, there are still many unsolved questions about the ecology of its agents. Direct isolation  
428 of *Paracoccidioides spp.* from soil is challenging and has been reported only a few times.  
429 However, detection of *Paracoccidioides* DNA from soil and aerosol samples is much more widely  
430 reported, suggesting that these fungi are saprophytes like those in the genera *Cryptococcus*,  
431 *Histoplasma* and *Blastomyces* [15, 22, 23].

432 In this study we analyzed the interaction of *Paracoccidioides spp.* with different soil amoebae. Our  
433 initial hypothesis was that the *Paracoccidioides spp.* virulence traits could have been selected by  
434 interactions with environmental predators such as amoebae and nematodes, as previously proposed

435 for other soil-born fungal and bacterial pathogens. We performed interaction assays between  
436 *Paracoccidioides* spp cells and four amoebae, including three amoebae that we isolated from soil  
437 - *Acanthamoeba* spp, *A. spelaea*, *V. vermiformis* - and an axenic laboratory strain of *A. castellanii*.  
438 *Acanthamoeba* is a genus of soil amoeba that can cause keratitis and granulomatous amoebic  
439 encephalitis [24]. *A. spelaea* was first identified in 2009 and it was also involved in human keratitis,  
440 but there is little information about it in the literature [25]. *V. vermiformis* is frequently isolated  
441 from soil and water environments, including hospital tap water [26]. Interestingly, all three genera  
442 have previously been reported to harbor potentially pathogenic intracellular microbes such as  
443 *Legionella pneumophila* [27-29]. Additionally, there are several reports on the interaction of *A.*  
444 *castellanii* with different pathogenic fungi, and *V. vermiformis* has been shown to promote  
445 *Candida* spp. growth in tap water and conidial filamentation of *A. fumigatus* [7, 8, 10, 30-32]. In  
446 our experiments, all four amoebae were able to internalize and kill *Paracoccidioides* cells and non-  
447 axenic amoeba cultures were able to grow using fungal cells as their major food source. Different  
448 microscopy approaches have shown fungal internalization and many dead fungal cells or empty  
449 fungal cell walls after interaction with amoebae. Dead fungal cells presented severely altered  
450 morphology, many of which showing perforations in their surface. These results point to other  
451 mechanisms of *Paracoccidioides* spp killing by amoebae that do not depend solely on  
452 phagocytosis. *Paracoccidioides* spp. yeast cells are relatively large, and a mother cell with multiple  
453 buds is much larger than some of the amoebae we studied. Nevertheless, these amoebae efficiently  
454 killed the fungi. Our observations are supported by previous reports from the late 70's of giant  
455 vampyrellid soil amoebae that perforated conidia and hyphae of several soil fungi such as  
456 *Cochliobolus sativus*, *Alternata alternaria* to feed upon their contents [33, 34]. This strategy bears  
457 a striking resemblance to vertebrate immune effector functions such as complement and granules  
458 from neutrophils, CD8+ T and NK cells. The selective pressure put on fungi by this amoeba feeding  
459 strategy could have led cell walls that are more resistant to the antimicrobial actions of these  
460 immune effectors.

461 At first, these results might contrast with what had been previously described for other pathogenic  
462 fungi such as *C. neoformans*, *Histoplasma capsulatum* and *Blastomyces dermatitidis* during the

463 early 2000's [7, 8]. However, our results are in accordance with previously published studies of  
464 fungal-amoeba interactions, in which *A. castellanii* was shown to efficiently use *C. neoformans*  
465 as a food source and was considered an important factor controlling fungi in the environment [35,  
466 36]. More recently, Fu and Casadevall reported that divalent cations have the ability to increase  
467 amoeba survival and potentiate their fungal killing abilities [37]. Their work points to one of the  
468 factors that might influence the outcome of fungal-amoeba interaction assays. The studies  
469 published in the early 2000's used PBS as the medium where interaction was assessed. In our  
470 assays we used PYG medium, which is supplemented with salts including CaCl<sub>2</sub> and MgSO<sub>4</sub>.  
471 Additionally, the fungal cells used in our experiments were not submitted to regular passages  
472 through an animal host. Although *Paracoccidioides* spp is a primary pathogen, previous reports  
473 and our own experience have shown that prolonged in vitro subculture of these fungi leads to  
474 attenuation or loss of its virulence and that it can be restored by animal passaging [38, 39].  
475 However, the same fungal strain was still able to kill a high proportion of macrophages in similar  
476 interaction conditions. These data suggest that despite the several similarities between amoebae  
477 and macrophages, there are important differences between these two cell host systems and/or that  
478 prolonged in vitro subculturing caused the fungal strain to lose virulence attributes that are more  
479 specific for its interaction with amoebae.

480 We further analyzed the interaction of *A. castellanii* with the sister species *P. lutzii* (Pb01) and  
481 with a *P. brasiliensis* strain isolated from an armadillo (T16B1). Regarding rates of  
482 internalization, and the ability to kill amoebae and to survive the interaction, Pb01 behaved  
483 identically to Pb18. However, the interaction of *A. castellanii* with T16B1 revealed that this strain  
484 was more efficient in surviving and killing the amoebae. Given that the armadillo strain was  
485 isolated about 7 years ago whereas Pb18 and Pb01 were isolated about 90 and 30 years ago,  
486 respectively [40, 41], these results point to the attenuation of *Paracoccidioides* spp. after  
487 prolonged in vitro subculturing. Our results are also compatible with previous work from other  
488 groups showing that *P. brasiliensis* armadillo isolates can be more virulent to mice and hamster  
489 models than some clinical strains submitted to prolonged in vitro culturing such as Pb18 [38, 42,  
490 43].

491 Sequential passages of interaction with amoeba select for changes in the virulence of *P.*  
492 *brasiliensis* Pb18. When the control and passaged strains (Pb18-Ac) were used in new interaction  
493 assays with *A. castellanii*, Pb18-Ac cells were more efficient in evading phagocytosis, surviving  
494 the interaction and killing the amoebae. The decrease in the yeast internalization may be an  
495 important reason for increased survival of the fungus. As we did not separate internalized from  
496 non-internalized yeast for the fungal survival assays, the rate of internalization might have  
497 affected our measurement of the fungal survival. The passaged strain was also able to survive  
498 better the interaction with J774 macrophages and had an increased ability to kill *G. mellonella*  
499 larvae and mice, confirming that interaction with *A. castellanii* was able to select for broader  
500 changes in fungal virulence. These results are in accordance with what was described for *H.*  
501 *capsulatum* and *C. neoformans* upon their interaction with amoebae [7, 44]. Quantitative PCR of  
502 selected virulence genes between the two strains revealed downregulation of MS1 and SOD1,  
503 genes previously shown to be upregulated in response of *P. brasiliensis* to macrophage at six  
504 hours of interaction [18]. In contrast, HADH and HSP60 were upregulated. HADH is involved in  
505 beta-oxidation and in production of ergosterol precursors, and was previously shown to be  
506 upregulated in *P. brasiliensis* response to hypoxia [45]. This gene and others related to beta-  
507 oxidation were also shown to be upregulated in *C. neoformans* response to interaction with both  
508 amoeba and fungi [19]. Interestingly, despite no differences in the accumulation of  $\alpha$ -glucan  
509 synthase transcript, we observed an increase in Pb18-Ac cell wall  $\alpha$ -(1,3) glucans relative to Pb18.  
510 This change could explain the differences in fungal phagocytosis by amoeba. The outermost layer  
511 of  $\alpha$ -(1,3) glucan in *H. capsulatum* cell wall has been shown to act as virulence factor by  
512 suppressing fungal recognition by host cells [21]. These results suggest similarities between  
513 fungal molecules that are recognized by phagocytosis receptors in amoebae and mammals.  
514 Overall, our results fit into the recently formulated amoeboid predator-fungal animal virulence  
515 hypothesis whereby there is a nexus of causation from selective pressure of amoeboid  
516 environmental predators and the evolution of fungal virulence against mammals [13]. We have  
517 shown that *Paracoccidioides* spp. may indeed interact with different amoebae species in its  
518 environment, and that soil protozoans, among other predators, could have a role as selective

519 pressure for the emergence virulence traits in this genus, since amoebae can revert attenuation of  
520 its virulence from in vitro passaging. However, it should be noted that, although amoeba might  
521 indeed play an important role as a fungal predator in the soil and promote natural selection of  
522 virulence against animal host, there is many other potential predators and competitors in the soil.  
523 Investigation of fungal interactions with other soil inhabitants could shed light on many unsolved  
524 questions about the development of fungal pathogenesis.

## 525 **Acknowledgments**

526 This work was supported by grants from the Brazilian agencies, Conselho Nacional de  
527 Desenvolvimento Científico e Tecnológico (CNPq) and Fundação de Apoio à Pesquisa do  
528 Distrito Federal (FAP-DF-Brazil). This study was also partially financed by scholarships from  
529 Coordenação de Aperfeiçoamento de Pessoal de Nível Superior (CAPES-Brazil, Finance code  
530 001). We are grateful for the valuable help of several people along the development of this work  
531 including Barbara Smith, Thales D. Arantes, Raquel Theodoro, Marluce F. Hrycyk, Carlos  
532 Eduardo Winter, Jessica Ferrão, Gabriela Matos, Cristine Barreto, Izabella Monteiro Rizzi de  
533 Azevedo, Bianca Oliveira do Vale Lira, Calliandra de Souza and Jhones Dias.

## 534 **Conflict of Interest**

535 The authors declare no conflicts of interest.

## 536 **References**

- 537 1. Casadevall, A., *Determinants of virulence in the pathogenic fungi*. Fungal Biol Rev,  
538 2007. **21**(4): p. 130-132.
- 539 2. Martinez, R., *New Trends in Paracoccidioidomycosis Epidemiology*. J Fungi (Basel),  
540 2017. **3**(1).
- 541 3. Turissini, D.A., et al., *Species boundaries in the human pathogen Paracoccidioides*.  
542 Fungal Genet Biol, 2017. **106**: p. 9-25.
- 543 4. Bocca, A.L., et al., *Paracoccidioidomycosis: eco-epidemiology, taxonomy and clinical*  
544 *and therapeutic issues*. Future Microbiol, 2013. **8**(9): p. 1177-91.
- 545 5. San-Blas, G., *Paracoccidioidomycosis and its etiologic agent Paracoccidioides*  
546 *brasiliensis*. J Med Vet Mycol, 1993. **31**(2): p. 99-113.
- 547 6. Malliaris, S.D., J.N. Steenbergen, and A. Casadevall, *Cryptococcus neoformans var.*  
548 *gattii can exploit Acanthamoeba castellanii for growth*. Med Mycol, 2004. **42**(2): p.  
549 149-58.
- 550 7. Steenbergen, J.N., et al., *Interaction of Blastomyces dermatitidis, Sporothrix schenckii,*  
551 *and Histoplasma capsulatum with Acanthamoeba castellanii*. Infect Immun, 2004.  
552 **72**(6): p. 3478-88.

- 553 8. Steenbergen, J.N., H.A. Shuman, and A. Casadevall, *Cryptococcus neoformans*  
554 *interactions with amoebae suggest an explanation for its virulence and intracellular*  
555 *pathogenic strategy in macrophages*. Proc Natl Acad Sci U S A, 2001. **98**(26): p. 15245-  
556 50.
- 557 9. Hillmann, F., et al., *Virulence determinants of the human pathogenic fungus Aspergillus*  
558 *fumigatus protect against soil amoeba predation*. Environ Microbiol, 2015. **17**(8): p.  
559 2858-69.
- 560 10. Van Waeyenberghe, L., et al., *Interaction of Aspergillus fumigatus conidia with*  
561 *Acanthamoeba castellanii parallels macrophage-fungus interactions*. Environ Microbiol  
562 Rep, 2013. **5**(6): p. 819-24.
- 563 11. Frager, S.Z., et al., *Paramecium species ingest and kill the cells of the human*  
564 *pathogenic fungus Cryptococcus neoformans*. Med Mycol, 2010. **48**(5): p. 775-9.
- 565 12. Mylonakis, E., et al., *Killing of Caenorhabditis elegans by Cryptococcus neoformans as a*  
566 *model of yeast pathogenesis*. Proc Natl Acad Sci U S A, 2002. **99**(24): p. 15675-80.
- 567 13. Casadevall, A., et al., *The 'Amoeboid Predator-Fungal Animal Virulence' Hypothesis*. J  
568 Fungi (Basel), 2019. **5**(1).
- 569 14. Arantes, T.D., et al., *Detection of Paracoccidioides spp. in environmental aerosol*  
570 *samples*. Med Mycol, 2013. **51**(1): p. 83-92.
- 571 15. Hrycyk, M.F., et al., *Ecology of Paracoccidioides brasiliensis, P. lutzii and related*  
572 *species: infection in armadillos, soil occurrence and mycological aspects*. Med Mycol,  
573 2018.
- 574 16. da Silva, M.A. and J.A. da Rosa, *[Isolation of potentially pathogenic free-living amoebas*  
575 *in hospital dust]*. Rev Saude Publica, 2003. **37**(2): p. 242-6.
- 576 17. Carlesso, A.M., et al., *[Isolation and identification of potentially pathogenic free-living*  
577 *amoebae in samples from environments in a public hospital in the city of Porto Alegre,*  
578 *Rio Grande do Sul]*. Rev Soc Bras Med Trop, 2007. **40**(3): p. 316-20.
- 579 18. Tavares, A.H., et al., *Early transcriptional response of Paracoccidioides brasiliensis upon*  
580 *internalization by murine macrophages*. Microbes Infect, 2007. **9**(5): p. 583-90.
- 581 19. Derengowski Lda, S., et al., *The transcriptional response of Cryptococcus neoformans to*  
582 *ingestion by Acanthamoeba castellanii and macrophages provides insights into the*  
583 *evolutionary adaptation to the mammalian host*. Eukaryot Cell, 2013. **12**(5): p. 761-74.
- 584 20. Tamayo, D., et al., *Involvement of the 90 kDa heat shock protein during adaptation of*  
585 *Paracoccidioides brasiliensis to different environmental conditions*. Fungal Genet Biol,  
586 2013. **51**: p. 34-41.
- 587 21. Rappleye, C.A., L.G. Eisenberg, and W.E. Goldman, *Histoplasma capsulatum alpha-*  
588 *(1,3)-glucan blocks innate immune recognition by the beta-glucan receptor*. Proc Natl  
589 Acad Sci U S A, 2007. **104**(4): p. 1366-70.
- 590 22. Restrepo, A., *The ecology of Paracoccidioides brasiliensis: a puzzle still unsolved*.  
591 Sabouraudia, 1985. **23**(5): p. 323-34.
- 592 23. Franco, M., et al., *A critical analysis of isolation of Paracoccidioides brasiliensis from*  
593 *soil*. Med Mycol, 2000. **38**(3): p. 185-91.
- 594 24. Siddiqui, R. and N.A. Khan, *Biology and pathogenesis of Acanthamoeba*. Parasit  
595 Vectors, 2012. **5**: p. 6.
- 596 25. Tolba, M.E., et al., *Allovalhikampfia spelaea Causing Keratitis in Humans*. PLoS Negl  
597 Trop Dis, 2016. **10**(7): p. e0004841.
- 598 26. Delafont, V., et al., *Vermamoeba vermiformis: a Free-Living Amoeba of Interest*.  
599 Microb Ecol, 2018. **76**(4): p. 991-1001.
- 600 27. Kuiper, M.W., et al., *Intracellular proliferation of Legionella pneumophila in*  
601 *Hartmannella vermiformis in aquatic biofilms grown on plasticized polyvinyl chloride*.  
602 Appl Environ Microbiol, 2004. **70**(11): p. 6826-33.
- 603 28. Mohamed, M., et al., *Allovalhikampfia spelaea is a potential environmental host for*  
604 *pathogenic bacteria*. J Bacteriol Parasitol, 2016. **7**(1): p. 1-7.



- 605 29. Balczun, C. and P.L. Scheid, *Free-Living Amoebae as Hosts for and Vectors of*  
606 *Intracellular Microorganisms with Public Health Significance*. Viruses, 2017. **9**(4).  
607 30. Maisonneuve, E., et al., *Vermamoeba vermiformis-Aspergillus fumigatus relationships*  
608 *and comparison with other phagocytic cells*. Parasitol Res, 2016. **115**(11): p. 4097-  
609 4105.  
610 31. Vanessa, B., et al., *Hartmannella vermiformis can promote proliferation of Candida*  
611 *spp. in tap-water*. Water Res, 2012. **46**(17): p. 5707-5714.  
612 32. Novohradska, S., I. Ferling, and F. Hillmann, *Exploring Virulence Determinants of*  
613 *Filamentous Fungal Pathogens through Interactions with Soil Amoebae*. Front Cell  
614 Infect Microbiol, 2017. **7**: p. 497.  
615 33. Old, K.M., *Giant soil amoebae cause perforation of conidia of Cochliobolus sativus*.  
616 Transactions of the British Mycological Society, 1977. **68**(2): p. 277-281.  
617 34. Old, K.M. and J.F. Darbyshire, *Soil fungi as food for giant amoebae*. Soil Biology and  
618 Biochemistry, 1978. **10**(2): p. 93-100.  
619 35. Bunting, L.A., J.B. Neilson, and G.S. Bulmer, *Cryptococcus neoformans: gastronomic*  
620 *delight of a soil ameba*. Sabouraudia, 1979. **17**(3): p. 225-32.  
621 36. Ruiz, A., J.B. Neilson, and G.S. Bulmer, *Control of Cryptococcus neoformans in nature by*  
622 *biotic factors*. Sabouraudia, 1982. **20**(1): p. 21-9.  
623 37. Fu, M.S. and A. Casadevall, *Divalent Metal Cations Potentiate the Predatory Capacity of*  
624 *Amoeba for Cryptococcus neoformans*. Appl Environ Microbiol, 2018. **84**(3).  
625 38. Macoris, S.A., et al., *Virulence attenuation and phenotypic variation of*  
626 *Paracoccidioides brasiliensis isolates obtained from armadillos and patients*. Mem Inst  
627 Oswaldo Cruz, 2006. **101**(3): p. 331-4.  
628 39. Brummer, E., et al., *Virulence of Paracoccidioides brasiliensis: the influence of in vitro*  
629 *passage and storage*. Mycopathologia, 1990. **109**(1): p. 13-7.  
630 40. Kashino, S.S., et al., *Alterations in the pathogenicity of one Paracoccidioides brasiliensis*  
631 *isolate do not correlate with its in vitro growth*. Mycopathologia, 1990. **111**(3): p.  
632 173-80.  
633 41. Soares, C.M., et al., *Characterization of Paracoccidioides brasiliensis isolates by random*  
634 *amplified polymorphic DNA analysis*. J Clin Microbiol, 1995. **33**(2): p. 505-7.  
635 42. Hebelers-Barbosa, F., M.R. Montenegro, and E. Bagagli, *Virulence profiles of ten*  
636 *Paracoccidioides brasiliensis isolates obtained from armadillos (Dasypus*  
637 *novemcinctus)*. Med Mycol, 2003. **41**(2): p. 89-96.  
638 43. Nishikaku, A.S., et al., *Experimental infections with Paracoccidioides brasiliensis*  
639 *obtained from armadillos: comparison to clinical isolates*. Braz J Infect Dis, 2008. **12**(1):  
640 p. 57-62.  
641 44. Steenbergen, J.N., et al., *Cryptococcus neoformans virulence is enhanced after growth*  
642 *in the genetically malleable host Dictyostelium discoideum*. Infect Immun, 2003. **71**(9):  
643 p. 4862-72.  
644 45. Lima Pde, S., et al., *Characterization of the Paracoccidioides Hypoxia Response Reveals*  
645 *New Insights into Pathogenesis Mechanisms of This Important Human Pathogenic*  
646 *Fungus*. PLoS Negl Trop Dis, 2015. **9**(12): p. e0004282.

647

## 648 **Figure Legends**

649 **Figure 1 – Soil organisms sharing the putative habitat of *P. brasiliensis*.**

650 A) Schematic representation of the soil amoeba isolation methodology. Soil samples from  
651 armadillo burrows positive for *P. brasiliensis* DNA were collected and used for the isolation of  
652 soil amoebae. The samples were plated in non-nutrient agar plates containing a bacterial lawn as

653 food source and observed in an inverted microscope B) Bright field microscopy of trophozoites  
654 of ciliates (black arrow heads) present in a soil sample. Scale bar = 20  $\mu\text{m}$ , C) Bright field  
655 microscopy of a nematode present in the soil sample. Scale bar = 50  $\mu\text{m}$ , D) and E) DIC  
656 microscopy of trophozoites of *A. spelaea*. Scale bar = 10  $\mu\text{m}$ . F and G) DIC microscopy of  
657 trophozoites of *V. vermiformis*. Scale bar = 10  $\mu\text{m}$ . H and I) DIC microscopy of trophozoites of  
658 *Acanthamoeba* spp. Scale bar = 10  $\mu\text{m}$ .

659 **Figure 2 – Interaction of *P. brasiliensis* Pb18 with amoebae isolated from soil of armadillo burrows**  
660 **positive for *P. brasiliensis*.**

661 The amoeba isolates were co-incubated with Pb18 previously dyed with pHrodo™ or FITC at a  
662 MOI of two at 25 °C for 24 h in liquid medium. A) Percentage of amoeba cells interacting with  
663 *P. brasiliensis* Pb18. After the interaction Pb18 cells were dyed using Uvitex 2B. B) Viability of  
664 the different amoeba isolates after 24 h of interaction with Pb18. A and D depicts the results of at  
665 least three independent experiments. At least 100 cells per replicate of each sample were counted  
666 for each assay. The bars represent 95% confidence intervals. C-F a suspension of *A. spelaea* cells  
667 was dropped next to a colony of *P. brasiliensis* cells in non-nutrient agar. The cells were co-  
668 incubated at 25 °C and examined daily in an inverted microscope. C) Macroscopic view of the  
669 fungal colony in a 35 mm plate. D) Microscopic view of the fungal cell lawn after seven days of  
670 interaction. E) Microscopic view of amoeba trophozoites growing in the periphery of the fungal  
671 lawn. F) Microscopic view of amoeba trophozoites interacting with a fungal cell. Scale bars = 50  
672  $\mu\text{m}$ . Black arrow heads indicate trophozoites. White arrow heads indicate fungal cells.

673 **Figure 3 – TEM and SEM analysis of the interaction of *P. brasiliensis* Pb18 cells and different soil**  
674 **amoebae.**

675 The isolates were co-incubated with Pb18 at a MOI of five at 25 °C for 24 h in PAS and fixed for  
676 microscopy. A-B) TEM of the interaction of *P. brasiliensis* with *A. spelaea*. Scale bars = 500 nm.  
677 C-D) SEM of the interaction of *P. brasiliensis* with *A. spelaea*. Scale bars = 10  $\mu\text{m}$ . E-F) TEM of  
678 the interaction of *P. brasiliensis* with *Acanthamoeba* spp. Scale bars = 2  $\mu\text{m}$ . G-H) SEM of the  
679 Interaction of *P. brasiliensis* with *Acanthamoeba* spp. Scale bars = 10  $\mu\text{m}$ . I-J) TEM of the  
680 interaction of *P. brasiliensis* with *V. vermiformis*. Scale bars = 2  $\mu\text{m}$ . K-L) SEM of the interaction  
681 of *P. brasiliensis* with *V. vermiformis*. Scale bars = 10  $\mu\text{m}$ . White arrows indicate fungal cells, or  
682 their remains and black arrow heads indicate amoeba cells.

683 **Figure 4 - *P. brasiliensis* Pb18 interaction with an axenic *Acanthamoeba castellanii* strain.**

684 **A)** *P. brasiliensis* and *A. castellanii* were co-incubated at a MOI of one for one hour at 28 °C, and  
685 then stained with Giemsa and observed by light microscopy. **B)** Enlargement of the area depicted  
686 in the square region of panel A. **C)** TEM of the interaction of *A. castellanii* and Pb18 cells.  
687 Incubation was at a MOI of one for six hours at 28 °C and then fixed. The black arrow indicates  
688 an internalized *P. brasiliensis* (Scale bar = 2  $\mu\text{m}$ ). **D)** Confocal microscopy. *A. castellanii* was  
689 dyed with DiD-DS (red), while *P. brasiliensis* cells were labeled first with CMFDA (green), and  
690 after the interaction with Uvitex 2B (blue). The arrows show fungal cells inside an amoeba. (Scale  
691 bar = 10  $\mu\text{m}$ ). **E** and **F)** Survival of *P. brasiliensis* after interaction with *A. castellanii* interaction.  
692 Incubation was at a MOI of two at 28 °C for six (**E**) or 24 hours (**F**), using the fungus alone as a  
693 control. After the interaction amoeba cells were lysed and fungal cells were plated for CFU  
694 counting. The figure depicts the results of three independent experiments. The error bars represent  
695 standard error of the mean.

696 **Figure 5. Interaction of *Paracoccidioides* spp strains with *A. castellanii* at six hours.**

697 Amoebae and three different strains of *Paracoccidioides* spp (Pb18 – *P. brasiliensis*, Pb01 – *P.*  
698 *lutzii*, T16B1 – *P. brasiliensis* isolated from an armadillo spleen) were co-incubated at a MOI of  
699 two at 28 °C. **A)** Percentage of *A. castellanii* cells interacting with *Paracoccidioides* spp. The  
700 interaction was assessed by counting at least 100 phagocytes cells per replicate of each sample  
701 after Giemsa staining of the samples. The bars represent 95% confidence intervals. **B)** Viability  
702 of *A. castellanii* upon interaction with *Paracoccidioides* spp. The viability was assessed by  
703 counting at least 100 cells per replicate of each sample after staining with trypan blue. The bars

704 represent means plus 95% confidence intervals. **C)** Survival of fungal cells from different strains  
705 of *Paracoccidioides* spp following interaction with amoebae. The error bars represent standard  
706 error of the mean. Figures depict the combined results of at least three independent experiments.  
707 \*All the strains showed a significant difference in the % of dead amoebae at six hours relative to  
708 the control amoebae growing alone.

709 **Figure 6 – Effects of sequential passaging of Pb18 within amoebae, assessed in several models of**  
710 **infection.**

711 Pb18 and Pb18 Pb-Ac cells were co-incubated with *A. castellanii* at a MOI of two at 28°C for six  
712 hours. **A)** Percentage of *A. castellanii* cells interacting with Pb18 and Pb18-Ac. **B)** Viability of *A.*  
713 *castellanii* after six hours of interaction with Pb18 and Pb18-Ac. **C)** Survival of Pb18 and Pb18-  
714 Ac upon interaction with *A. castellanii*. **D)** Survival of Pb18 and Pb18 Pb-Ac upon interaction  
715 with J774 macrophages. **E)** Survival curve of *G. mellonella* infected with Pb18 and Pb18-Ac. The  
716 curve is representative of two biological replicates.  $P < 0.0001$  for the comparison of the survival  
717 curve of larvae infected with the two different strains (log-rank test). **F)** Survival curve of BALB/c  
718 mice infected with Pb18 or Pb18 Pb-Ac. Each group had 15 mice.  $p = 0.0003$  for the comparison  
719 of the survival curve of mice infected with the two strains (log-rank test). **A-D** depict the  
720 combined results of at least two independent experiments. The bars represent means plus 95%  
721 confidence intervals in **A** and **B** and standard error mean in **C** and **D**.

722 **Figure 7- Modulation of Pb18 gene expression after passaging with amoebae.**

723 Transcript accumulation was determined by the comparative threshold method using the  $\Delta C_t$   
724 value obtained after normalization with the constitutively expressed gene L34. Data are reported  
725 as individual  $2^{-\Delta C_t}$  values of three independent experiments for each group and the bar represents  
726 their respective means. FC = *fold change in mRNA accumulation*, obtained as the ratio Pb18-  
727 Ac/Pb18. \*\* =  $p < 0.01$ . \*\*\* =  $p < 0.001$ . ns =  $p > 0.05$ . **A)** AGS1:  $\alpha$ -glucan synthase, **B)** HADH:  
728 Hydroxyacyl-CoA Dehydrogenase, **C)** MS1: malate synthase, **D)** SOD1: superoxide dismutase  
729 1, **E)** HSP60: Heat shock protein 60, **F)** HSP70: Heat shock protein 70, **G)** HSP90: Heat shock  
730 protein 90. **H)** Cell surface staining of  $\alpha$  glucan in the surface of Pb18 and Pb18-Ac.

731

732
